# Supplementary material
Source: publisher site journal article supplement (http://www.scielo.br/pdf/ress/v24n2/2237-9622-ress-24-02-00335-suppl02.pdf)

**Identificação**

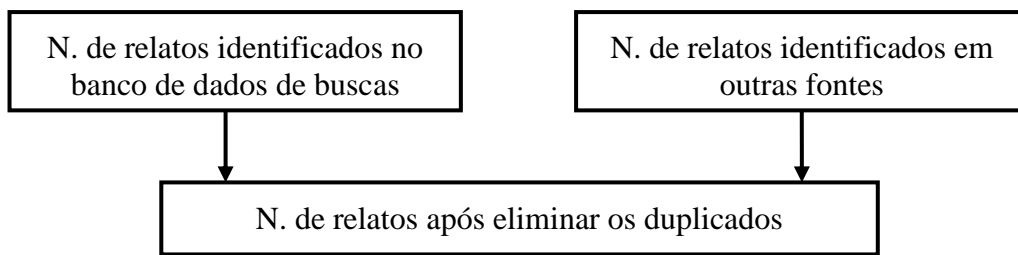

**Seleção**

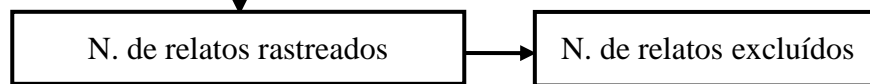

**Elegibilidade**

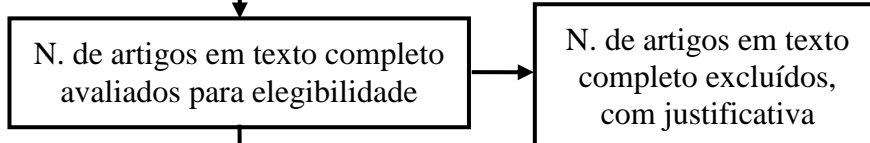

**Inclusão**

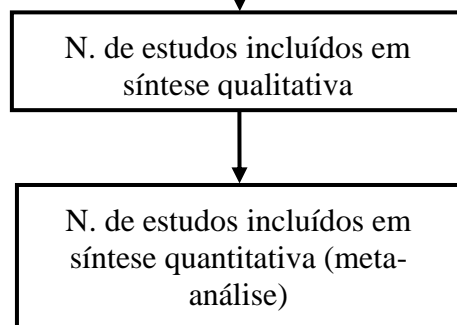

Supplement: Supplementary file 1 [file 2237-9622-ress-24-02-00335-suppl02.pdf]
